# Supplementary material
Source: PubMed Central journal article supplement (PMC1183554)

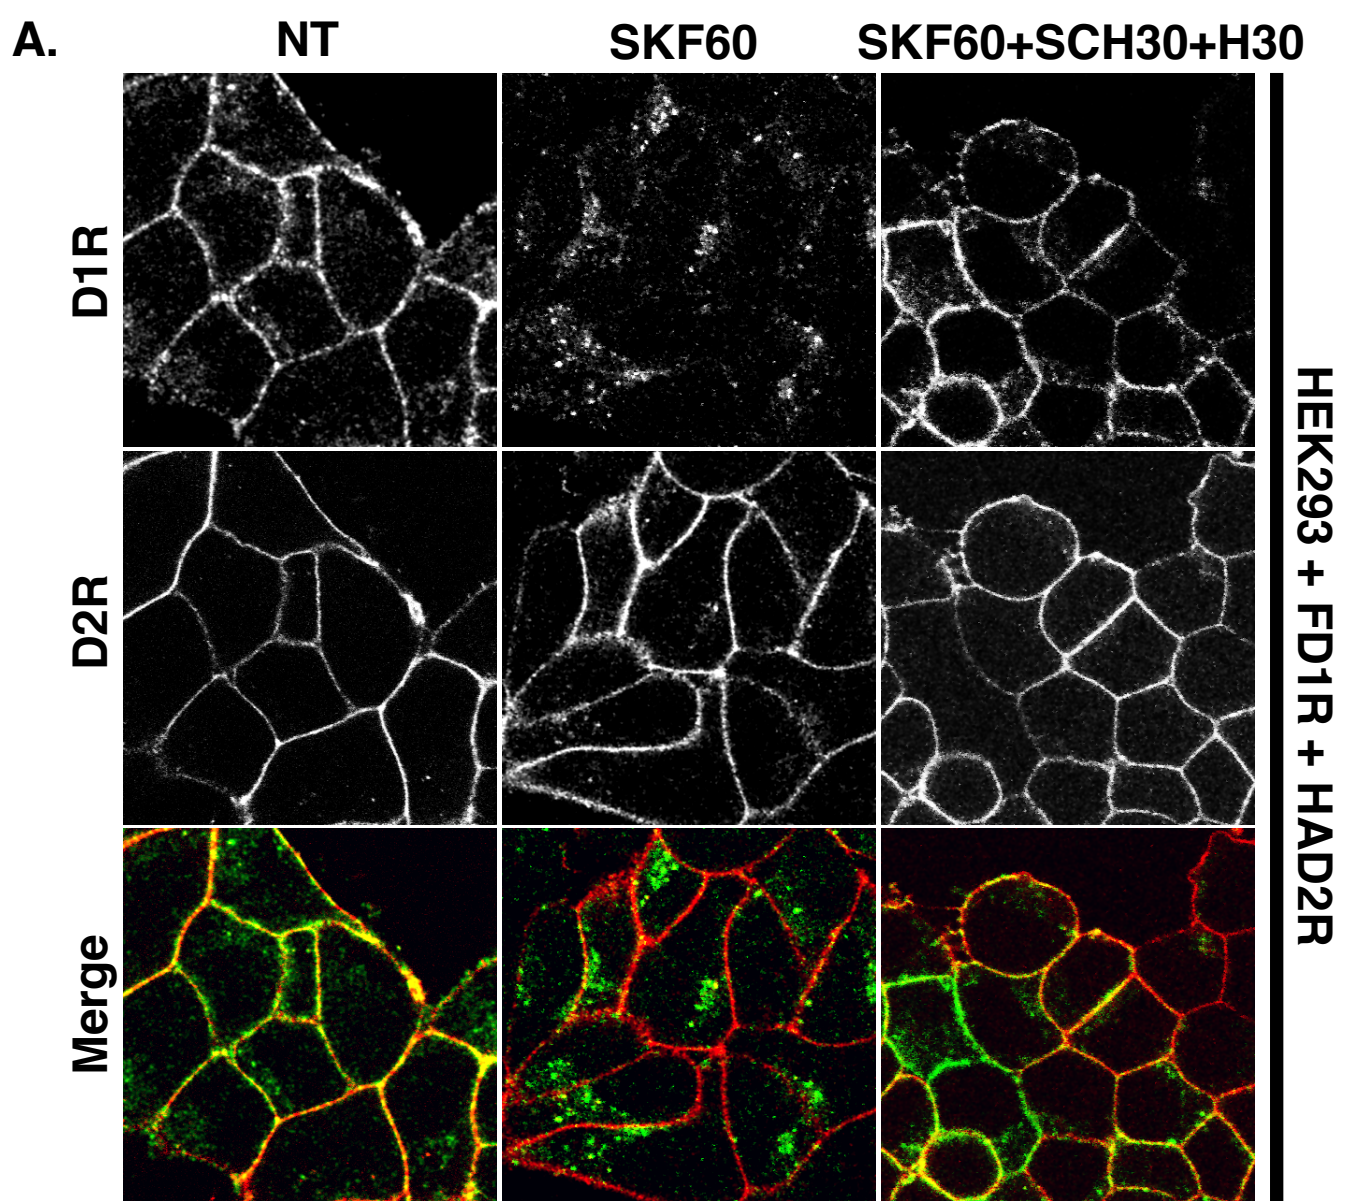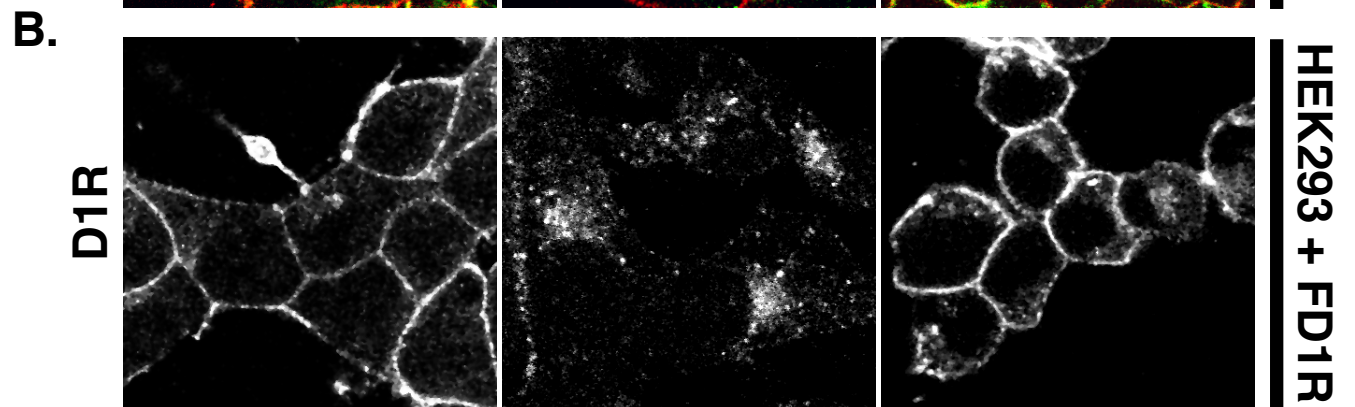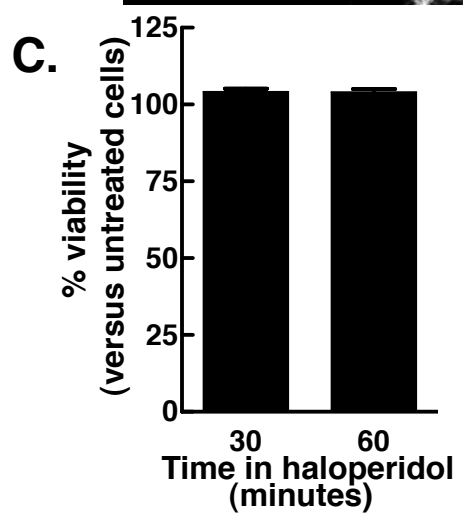

Supplement: pnas_0502418102_2.pdf [file pnas_0502418102_2.pdf]
